# Supplementary material for: An Investigation of the Role of Common and Rare Variants in a Large Italian Multiplex Family of Multiple Sclerosis Patients
Source: Genes (Basel). 2021 Oct 13;12(10):1607. doi: 10.3390/genes12101607 (PMC8535321; doi:10.3390/genes12101607)
Supplement: Supplementary file 1 [file genes-12-01607-s001.zip]

Archive with 6 entries (6 files):
- genes-1361747 SI.pdf
- Table S2.xlsx
- Table S3.xlsx
- Table S4.xlsx
- Table S5.xlsx
- Table S6.xlsx
