# Supplementary material for: An Investigation of the Role of Common and Rare Variants in a Large Italian Multiplex Family of Multiple Sclerosis Patients
Source: Genes (Basel). 2021 Oct 13;12(10):1607. doi: 10.3390/genes12101607 (PMC8535321; doi:10.3390/genes12101607)
Supplement: Supplementary file 1 [file genes-12-01607-s001.zip › Table S2.xlsx]

## Sheet: Foglio1
Table S2: Non-HLA markers used for wGRS calculation
rsID	Gene	Chr	position (hg19)	Risk allele	OR	Proxy used	r2
rs4648356	MMEL1	1	2709164	C	1.14	rs3890745	1
rs11810217	EVI5	1	93148377	A	1.15	rs11808092	0.958
rs11581062	VCAM1	1	101407519	G	1.12
rs1335532	CD58	1	117100957	A	1.22
rs1323292	RGS1	1	192541021	A	1.12	rs2816316	1
rs7522462	KIF21B	1	200881595	G	1.11	rs2297909	0.963
rs12466022	no gene	2	43359061	C	1.11
rs7595037	PLEK	2	68647095	A	1.11
rs17174870	MERTK	2	112665201	G	1.11
rs10201872	SP140	2	231106724	A	1.14	rs13397985	0.898
rs11129295	EOMES	3	27788780	A	1.11	rs9823274	0.618
rs669607	no gene	3	28071444	C	1.13
rs2028597	CBLB	3	105558837	G	1.13
rs2293370	TMEM39A	3	119219934	G	1.13
rs9282641	CD86	3	121796768	G	1.21
rs2243123	IL12A	3	159709651	G	1.08
rs6897932	IL7R	5	35874575	G	1.11
rs4613763	PTGER4	5	40392728	G	1.20
rs2546890	IL12B	5	158759900	A	1.11
rs12212193	BACH2	6	90996769	G	1.09
rs802734	THEMIS	6	128278798	A	1.10
rs11154801	MYB	6	135739355	A	1.13
rs17066096	IL22RA2	6	137452908	G	1.14
rs13192841	OLIG3	6	137967214	A	1.10	rs10499194	1
rs1738074	TAGAP	6	159465977	G	1.13
rs354033	ZNF746	7	149289464	G	1.11
rs1520333	IL7	8	79401038	G	1.10
rs4410871	MYC	8	128815029	G	1.11
rs2019960	PVT1	8	129192271	G	1.12
rs3118470	IL2RA	10	6101713	G	1.12
rs1250550	ZMIZ1	10	81060317	A	1.10
rs7923837	HHEX	10	94481917	G	1.10	rs5015480	0.663
rs650258	CD6	11	60832282	G	1.12
rs1800693	TNFRSF1A	12	6440009	G	1.12
rs10466829	CLECL1	12	9876091	A	1.09	rs3764021	0.870
rs12368653	CYP27B1	12	58133256	A	1.10
rs949143	MPHOSPH9	12	123595163	G	1.08	rs1727307	1
rs4902647	ZFP36L1	14	69254191	G	1.11
rs2300603	BATF	14	76005557	A	1.11
rs2119704	GALC	14	88487689	C	1.22	rs73312836	1
rs7200786	CLEC16A	16	11177801	A	1.15	rs2903692	0.630
rs13333054	IRF8	16	86011033	A	1.11
The OR is referred to the risk allele.
