# Supplementary material for: An Investigation of the Role of Common and Rare Variants in a Large Italian Multiplex Family of Multiple Sclerosis Patients
Source: Genes (Basel). 2021 Oct 13;12(10):1607. doi: 10.3390/genes12101607 (PMC8535321; doi:10.3390/genes12101607)
Supplement: Supplementary file 1 [file genes-12-01607-s001.zip › Table S6.xlsx]

## Sheet: Foglio1
Table S6: low-frequency functional variants observed in the replication (multiplex sample set)
ID	CHROM	POS		ID	REF	ALT	ANN.EFFECT	ANN.IMPACT	ANN.GENENAME	AF_MAX_OF_MIN_EUR	dbNSFP_CADD_phred	dbNSFP_PROVEAN_pred	dbNSFP_Polyphen2_HDIV_pred	dbNSFP_SIFT_pred	dbNSFP_MetaSVM_pred.1	dbNSFP_MutationTaster_pred	Varsome
rs140365800	chr9	107582258	chr9_107582258	rs140365800	T	C	missense_variant	MODERATE	ABCA1	0.000697674	32	D	D	D	D	D	uncertain significance with some pathogenic evidence
rs138880920	chr9	107589238	chr9_107589238	rs138880920	C	G	missense_variant	MODERATE	ABCA1	0.00337521	27.6	D	D	D	D	D	benign
rs762673375	chr21	28296628	chr21_28296628	rs762673375	C	T	missense_variant	MODERATE	ADAMTS5	2.99688e-05	27.0	D	D	D	T	D	uncertain significance
rs146717299	chr21	28305324	chr21_28305324	rs146717299	C	T	missense_variant	MODERATE	ADAMTS5	0.0199	34	D	D	D	T	D	uncertain significance
rs61088614	chr21	28315841	chr21_28315841	rs61088614	G	A	structural_interaction_variant	HIGH	ADAMTS5	0.006	NA	NA	NA	NA	NA	NA	benign
rs765470451	chr21	28327098	chr21_28327098	rs765470451	G	A	structural_interaction_variant	HIGH	ADAMTS5	4.49735e-05	NA	NA	NA	NA	NA	NA	likely benign
rs61754847	chr21	28338307	chr21_28338307	rs61754847	G	T	missense_variant	MODERATE	ADAMTS5	0.004	25.6	D	P	D	T	D	uncertain significance
rs78037991	chr21	28338425	chr21_28338425	rs78037991	G	A	missense_variant	MODERATE	ADAMTS5	0.0249	33	D	D	D	T	N	likely benign
rs201776257	chr18	31319710	chr18_31319710	rs201776257	C	T	missense_variant	MODERATE	ASXL3	0.000454559	23.0	N	P	D	T	D	likely benign
rs190659120	chr18	31320333	chr18_31320333	rs190659120	C	G	missense_variant	MODERATE	ASXL3	0.003	21.5	D	P	D	T	D	likely benign
rs202041409	chr18	31323929	chr18_31323929	rs202041409	A	G	missense_variant	MODERATE	ASXL3	8.95432e-05	23.2	N	P	D	T	D	likely benign
rs144534810	chr18	31326012	chr18_31326012	rs144534810	T	G	missense_variant	MODERATE	ASXL3	0.0108688	23.1	N	D	D	T	D	benign
rs201165264	chr12	7045254	chr12_7045254	rs201165264	C	T	missense_variant	MODERATE	ATN1	0.00107311	21.2	N	D	D	T	D	benign
rs782123218	chr12	7046283	chr12_7046283	rs782123218	T	A	missense_variant	MODERATE	ATN1	0.000133833	22.9	N	D	D	T	D	uncertain significance with minor pathogenic evidence
rs371882969	chr12	7047154	chr12_7047154	rs371882969	A	G	missense_variant	MODERATE	ATN1	0.000122579	25.6	D	B	D	T	D	uncertain significance with minor pathogenic evidence
rs3831366;rs368050244	chr1	1334052	chr1_1334052	rs3831366;rs368050244	CTAGAG	C	splice_acceptor_variant&splice_region_variant&intron_variant	HIGH	CCNL2	0.0487	NA	NA	NA	NA	NA	NA	benign
rs77769111	chr6	38738337	chr6_38738337	rs77769111	T	C	splice_donor_variant&intron_variant	HIGH	DNAH8	0.002	24.8	NA	NA	NA	NA	D	benign
rs756220469	chr6	38810479	chr6_38810479	rs756220469	T	G	missense_variant	MODERATE	DNAH8	1.79511e-05	26.6	D	P	D	T	D	uncertain significance with minor pathogenic evidence
rs199737918	chr6	38818051	chr6_38818051	rs199737918	G	A	missense_variant	MODERATE	DNAH8	0.001	32	D	D	D	T	D	uncertain significance with minor pathogenic evidence
rs45519938	chr6	38820493	chr6_38820493	rs45519938	C	A	missense_variant	MODERATE	DNAH8	0.0162515	25.8	D	P	D	T	D	benign
rs200037660	chr6	38830061	chr6_38830061	rs200037660	A	G	missense_variant	MODERATE	DNAH8	0.000266631	26.7	D	D	D	T	D	uncertain significance with minor pathogenic evidence
rs61758417	chr6	38840492	chr6_38840492	rs61758417	G	T	missense_variant	MODERATE	DNAH8	0.00205348	28.6	D	D	D	T	P	benign
rs368846740	chr6	38891817	chr6_38891817	rs368846740	C	T	missense_variant	MODERATE	DNAH8	0	34	D	D	D	D	D	uncertain significance with minor pathogenic evidence
rs61757218	chr6	38905957	chr6_38905957	rs61757218	C	T	missense_variant	MODERATE	DNAH8	0.00703326	34	D	D	D	D	D	likely benign
rs781988825	chr8	145535187	chr8_145535187	rs781988825	A	ACCTGCACCTG	splice_acceptor_variant&intron_variant	HIGH	HSF1	7.53466e-05	NA	NA	NA	NA	NA	NA	uncertain significance
chr8:145535194	chr8	145535194	chr8_145535194	chr8:145535194	CCT	C	frameshift_variant	HIGH	HSF1	-1	NA	NA	NA	NA	NA	NA	pathogenic
rs201422904	chr8	145535785	chr8_145535785	rs201422904	T	G	missense_variant	MODERATE	HSF1	0.000465333	22.7	N	P	D	T	D	uncertain significance
rs745556410	chr2	241685243	chr2_241685243	rs745556410	G	A	missense_variant	MODERATE	KIF1A	6.34046e-05	27.3	D	D	D	T	D	uncertain significance with minor pathogenic evidence
rs757726053	chr2	241697865	chr2_241697865	rs757726053	G	A	missense_variant	MODERATE	KIF1A	0.000133529	22.0	D	D	T	T	D	uncertain significance with minor pathogenic evidence
rs114860672	chr1	245530583	chr1_245530583	rs114860672	A	C	missense_variant	MODERATE	KIF26B	0.00605334	22.6	N	D	D	T	D	likely benign
rs768486000	chr1	245770969	chr1_245770969	rs768486000	G	A	missense_variant	MODERATE	KIF26B	1.82755e-05	24.7	D	D	D	T	D	uncertain significance with minor pathogenic evidence
rs368623828	chr1	245847632	chr1_245847632	rs368623828	G	A	missense_variant	MODERATE	KIF26B	8.06192e-05	23.4	D	P	T	T	D	likely benign
rs150834033	chr1	245851609	chr1_245851609	rs150834033	C	G	missense_variant	MODERATE	KIF26B	0.0492099	20.7	D	D	D	D	D	uncertain significance
rs372241056	chr18	44101094	chr18_44101094	rs372241056	A	G	missense_variant	MODERATE	LOXHD1	0.000667289	25.2	N	D	D	T	D	likely benign
chr18:44113161	chr18	44113161	chr18_44113161	chr18:44113161	G	A	missense_variant	MODERATE	LOXHD1	0.000200133	29.8	D	D	D	T	D	likely benign
rs146739496	chr18	44113283	chr18_44113283	rs146739496	G	A	missense_variant	MODERATE	LOXHD1	0.004	28.9	N	P	D	T	D	benign
rs369695848	chr18	44122711	chr18_44122711	rs369695848	G	A	missense_variant	MODERATE	LOXHD1	0.000314268	27.3	D	D	D	D	D	uncertain significance with minor pathogenic evidence
rs118174674	chr18	44137400	chr18_44137400	rs118174674	C	T	missense_variant	MODERATE	LOXHD1	0.0229	20.2	D	D	D	T	D	benign
rs199847981	chr18	44140109	chr18_44140109	rs199847981	G	A	missense_variant	MODERATE	LOXHD1	0.002	21.1	D	D	D	T	D	uncertain significance with minor pathogenic evidence
rs35088381	chr18	44157746	chr18_44157746	rs35088381	C	A	missense_variant	MODERATE	LOXHD1	0.0221839	28.2	D	D	D	D	D	benign
rs34589386	chr18	44157764	chr18_44157764	rs34589386	C	A	missense_variant	MODERATE	LOXHD1	0.0221635	26.1	D	D	D	T	D	benign
rs192376005	chr18	44171980	chr18_44171980	rs192376005	G	A	missense_variant	MODERATE	LOXHD1	0.00397041	33	D	D	T	T	D	uncertain significance with minor pathogenic evidence
rs36024592	chr18	44236995	chr18_44236995	rs36024592	A	T	start_lost	HIGH	LOXHD1	0.0425106	20.2	N	P	D	T	N	benign
rs61753655	chr17	1372839	chr17_1372839	rs61753655	C	T	missense_variant	MODERATE	MYO1C	0.0132826	29.4	N	P	T	D	D	likely benign
rs61753652	chr17	1372861	chr17_1372861	rs61753652	T	G	missense_variant	MODERATE	MYO1C	0.0139	23.1	D	P	T	D	D	likely benign
rs78672478	chr17	1375218	chr17_1375218	rs78672478	G	A	structural_interaction_variant	HIGH	MYO1C	0.00465116	NA	NA	NA	NA	NA	NA	likely benign
chr17:1375234	chr17	1375234	chr17_1375234	chr17:1375234	G	A	structural_interaction_variant	HIGH	MYO1C	-1	34	D	D	D	D	D	uncertain significance with minor pathogenic evidence
rs754174814	chr17	1378307	chr17_1378307	rs754174814	G	A	missense_variant	MODERATE	MYO1C	0.000267023	34	D	D	D	D	N	likely benign
rs201395025	chr17	1383858	chr17_1383858	rs201395025	G	C	missense_variant	MODERATE	MYO1C	0.002	26.0	D	D	D	D	D	uncertain significance with minor pathogenic evidence
rs183182609	chr15	52497148	chr15_52497148	rs183182609	C	G	structural_interaction_variant	HIGH	MYO5C	7.51428e-05	28.8	D	D	D	D	D	uncertain significance
rs72734946	chr15	52543615	chr15_52543615	rs72734946	G	T	missense_variant	MODERATE	MYO5C	0.0153584	27.9	D	D	D	D	D	uncertain significance
chr15:52564816	chr15	52564816	chr15_52564816	chr15:52564816	C	T	missense_variant	MODERATE	MYO5C	-1	26.1	D	B	D	T	D	uncertain significance with minor pathogenic evidence
chr15:52564917	chr15	52564917	chr15_52564917	chr15:52564917	C	A	missense_variant	MODERATE	MYO5C	-1	24.1	D	B	D	T	D	uncertain significance
rs201620358	chr9	139405111	chr9_139405111	rs201620358	G	A	missense_variant	MODERATE	NOTCH1	0.00327103	31	D	D	D	D	D	benign
rs138504021	chr9	139409976	chr9_139409976	rs138504021	C	T	missense_variant	MODERATE	NOTCH1	0.003	28.5	N	D	T	D	D	uncertain significance
rs761244165	chr9	139411781	chr9_139411781	rs761244165	G	A	structural_interaction_variant	HIGH	NOTCH1	2.16694e-05	NA	NA	NA	NA	NA	NA	likely benign
rs376104770	chr9	139413909	chr9_139413909	rs376104770	G	A	missense_variant	MODERATE	NOTCH1	0.000482509	24.2	D	D	D	D	D	likely benign
rs61756436	chr10	103899659	chr10_103899659	rs61756436	A	G	missense_variant	MODERATE	PPRC1	0.0133369	23.8	N	P	D	T	D	likely benign
rs758322825	chr10	103904007	chr10_103904007	rs758322825	C	T	missense_variant&splice_region_variant	MODERATE	PPRC1	0.000133565	25.4	N	P	D	T	D	uncertain significance with minor pathogenic evidence
rs118161359	chr10	103906612	chr10_103906612	rs118161359	G	A	missense_variant	MODERATE	PPRC1	0.0268	22.4	N	P	D	T	D	likely benign
rs34169738	chr10	103907055	chr10_103907055	rs34169738	C	T	missense_variant	MODERATE	PPRC1	0.0217442	25.5	N	D	D	T	D	likely benign
chr10:103908275	chr10	103908275	chr10_103908275	chr10:103908275	G	A	missense_variant	MODERATE	PPRC1	-1	26.4	N	P	D	T	D	uncertain significance with minor pathogenic evidence
rs746594719	chr15	62939562	chr15_62939562	rs746594719	C	T	missense_variant	MODERATE	TLN2	0.000119872	33	D	D	D	D	D	uncertain significance
rs760629497	chr15	62986520	chr15_62986520	rs760629497	A	C	missense_variant	MODERATE	TLN2	1.50087e-05	23.3	D	P	D	T	D	uncertain significance with minor pathogenic evidence
chr18:66358530	chr18	66358530	chr18_66358530	chr18:66358530	A	G	splice_donor_variant&intron_variant	HIGH	TMX3	-1	24.5	NA	NA	NA	NA	D	pathogenic
